# Supplementary material for: Effects of Surface Functionalization of Lignin on Synthesis and Properties of Rigid Bio-Based Polyurethanes Foams
Source: PubMed Central journal article supplement (PMC6404063; doi:10.3390/polym10070706), 2018-06-26
Supplement: polymers-10-00706-s001.pdf [file polymers-10-00706-s001.pdf]

*Supporting Information*

## **Effects of Surface Functionalization of Lignin on Synthesis and Properties of Rigid Bio-based Polyurethanes Foams**

**Xuefeng Zhang\*, Dragica Jeremic, Yunsang Kim, Jason Street, Rubin Shmulsky\***

Department of Sustainable Bioproducts, Mississippi State University, Mississippi State, MS 39762, USA

### **Contents:**

**10 Pages, including 10 tables and 4 figures.**

|                                                         |       |
|---------------------------------------------------------|-------|
| 1. Inventory data for life cycle assessment (LCA) ..... | S2-S4 |
| 2. Characterization of lignin and polyol .....          | S5-S8 |
| 3. LCA units and model output .....                     | S9    |

**Inventory data for life cycle assessment (LCA)**

**Table S1.** Flows of traditional polyurethane creation.

| <b>Flow input</b>                                                  | <b>Category</b>                         | <b>Amount</b> | <b>Unit</b> |
|--------------------------------------------------------------------|-----------------------------------------|---------------|-------------|
| disposal, polyurethane, 0.2% water, to municipal incineration - CH | waste management/municipal incineration | 0.02          | kg          |
| methylene diphenyl diisocyanate, at plant - RER                    | plastics/monomers                       | 0.5           | kg          |
| pentane, at plant - RER                                            | chemicals/organics                      | 0.054         | kg          |
| polyols, at plant - RER                                            | plastics/monomers                       | 0.5           | kg          |
| <b>Flow Output</b>                                                 | <b>Category</b>                         | <b>Amount</b> | <b>Unit</b> |
| Pentane                                                            | Emission to air/high population density | 0.003         | kg          |
| polyurethane, rigid foam, at plant - RER                           | plastics/polymers                       | 1             | kg          |

**Table S2.** Flows of functionalized lignin-based polyurethane creation.

| <b>Flow input</b>                                                  | <b>Category</b>                         | <b>Amount</b> | <b>Unit</b> |
|--------------------------------------------------------------------|-----------------------------------------|---------------|-------------|
| disposal, polyurethane, 0.2% water, to municipal incineration - CH | waste management/municipal incineration | 0.02          | kg          |
| kraft lignin (Bernier)                                             | Agriculture, forestry                   | 0.15          | kg          |
| methylene diphenyl diisocyanate, at plant - RER                    | plastics/monomers                       | 0.5           | kg          |
| pentane, at plant - RER                                            | chemicals/organics                      | 0.054         | kg          |
| polyols, at plant - RER                                            | plastics/monomers                       | 0.35          | kg          |
| <b>Flow Output</b>                                                 | <b>Category</b>                         | <b>Amount</b> | <b>Unit</b> |
| Pentane                                                            | Emission to air/high population density | 0.003         | kg          |
| polyurethane, rigid foam, at plant - RER                           | plastics/polymers                       | 1             | kg          |

**Table S3.** Flows of liquefaction polyurethane creation.

| <b>Flow input</b>                                                  | <b>Category</b>                         | <b>Amount</b> | <b>Unit</b> |
|--------------------------------------------------------------------|-----------------------------------------|---------------|-------------|
| disposal, polyurethane, 0.2% water, to municipal incineration - CH | waste management/municipal incineration | 0.02          | kg          |
| kraft lignin (Bernier)                                             | Agriculture, forestry                   | 0.15          | kg          |
| methylene diphenyl diisocyanate, at plant - RER                    | plastics/monomers                       | 0.5           | kg          |
| pentane, at plant - RER                                            | chemicals/organics                      | 0.054         | kg          |
| sulphuric acid, at plant                                           | ecoinvent 2.2                           | 0.015         | kg          |
| glycerine, from epichlorohydrin, at plant - RER                    | chemicals/organics                      | 0.07          | kg          |
| ethylene oxide, at plant –RER                                      | chemicals/organics                      | 0.27933       | kg          |
| ethylene glycol, at plant - RER                                    | chemicals/organics                      | 0.00098       | kg          |
| <b>Flow Output</b>                                                 | <b>Category</b>                         | <b>Amount</b> | <b>Unit</b> |
| Pentane                                                            | Emission to air/high population density | 0.003         | kg          |
| polyurethane, rigid foam, at plant - RER                           | plastics/polymers                       | 1             | kg          |

Polyethylene glycol was modeled using the following chemical reaction of ethylene glycol and ethylene oxide with a chain length of 400 (n=400)

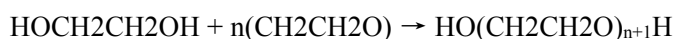

**Table S4.** Flows of oxypropylation polyurethane creation.

| <b>Flow input</b>                                                  | <b>Category</b>                         | <b>Amount</b> | <b>Unit</b> |
|--------------------------------------------------------------------|-----------------------------------------|---------------|-------------|
| disposal, polyurethane, 0.2% water, to municipal incineration - CH | waste management/municipal incineration | 0.02          | kg          |
| kraft lignin (Bernier)                                             | Agriculture, forestry                   | 0.15          | kg          |
| methylene diphenyl diisocyanate, at plant - RER                    | plastics/monomers                       | 0.5           | kg          |
| pentane, at plant - RER                                            | chemicals/organics                      | 0.054         | kg          |
| potassium hydroxide, at regional storage - RER                     | chemicals/inorganics                    | 0.015         | kg          |
| propylene oxide, liquid, at plant - RER                            | chemicals/organics                      | 0.35          | kg          |
| <b>Flow Output</b>                                                 | <b>Category</b>                         | <b>Amount</b> | <b>Unit</b> |
| Pentane                                                            | Emission to air/high population density | 0.003         | kg          |
| polyurethane, rigid foam, at plant - RER                           | plastics/polymers                       | 1             | kg          |

**Table S5.** Flows of kraft lignin creation (Bernier) [S1].

| <b>Flow input</b>                                                   | <b>Category</b>       | <b>Amount</b> | <b>Unit</b>    |
|---------------------------------------------------------------------|-----------------------|---------------|----------------|
| carbon dioxide, at plant/RER U                                      | ecoinvent2.2          | 0.3           | kg             |
| electricity, medium voltage, at grid - US                           | ecoinvent2.2          | 0.01          | kWh            |
| natural gas, burned in boiler modulating >100kW                     | ecoinvent2.2          | 31.5          | MJ             |
| lime, hydrated, packed, at plant                                    | ecoinvent2.2          | 0.23          | kg             |
| sodium hydroxide, 50% in H <sub>2</sub> O, production mix, at plant | ecoinvent2.2          | 1.07          | kg             |
| sulphuric acid, liquid, at plant                                    | ecoinvent2.2          | 0.23          | kg             |
| transport, lorry 16-32t, EURO4                                      | ecoinvent2.2          | 0.934         | t×km           |
| Water, process, unspecified natural origin                          | water/unspecified     | 0.00485       | m <sup>3</sup> |
| <b>Flow Output</b>                                                  | <b>Category</b>       | <b>Amount</b> | <b>Unit</b>    |
| kraft lignin (Bernier)                                              | Agriculture, forestry | 1             | kg             |

## Characterization results

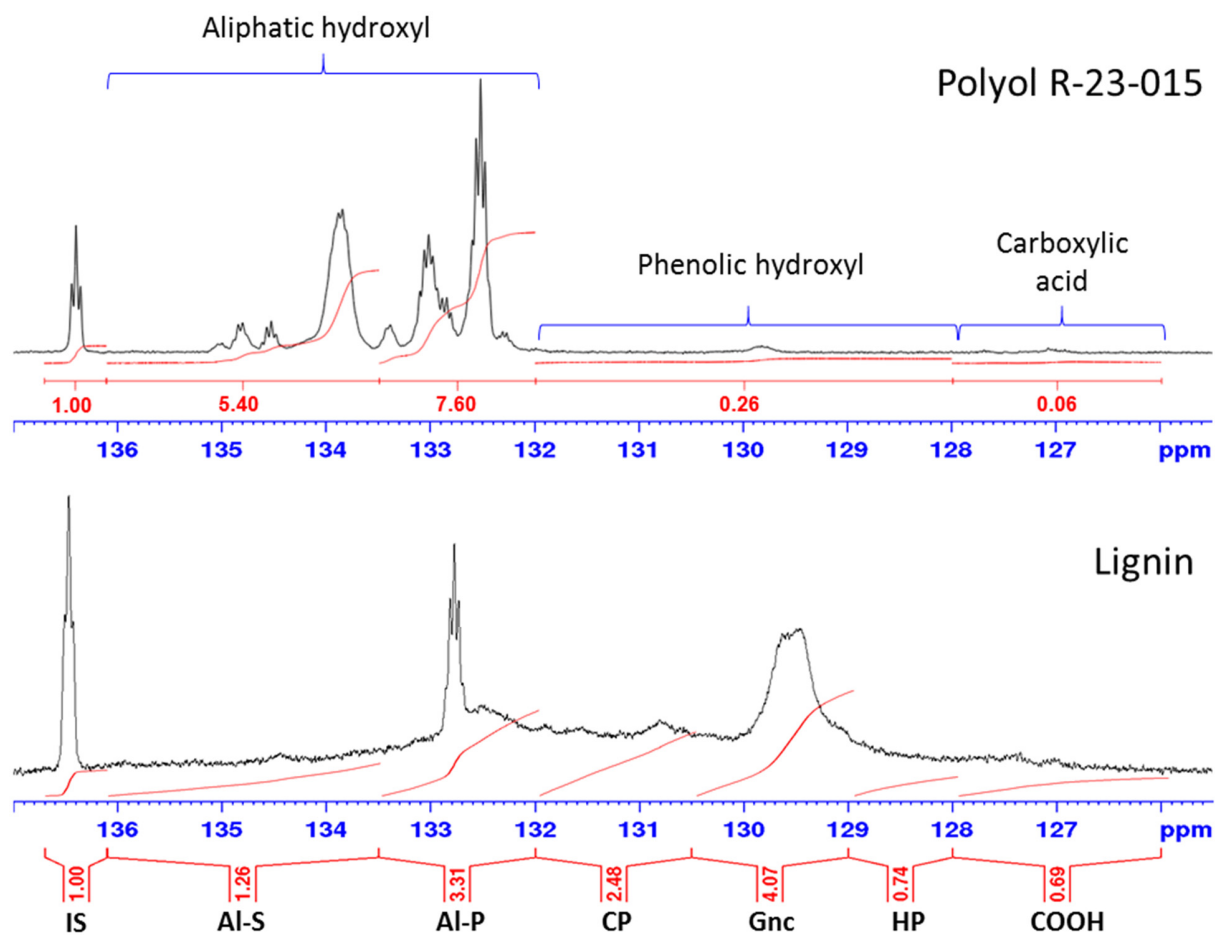

**Figure S1.**  $^{31}\text{P}$ -NMR spectra of the polyol R-23-015 and lignin. IS, internal standard (136.7-136.1 ppm); Al-S, secondary aliphatic OH (136.1-133.5 ppm); Al-P, primary aliphatic OH (133.5-132.0 ppm); CP, condensed phenolic OH (132-130.5 ppm); Gnc, non-condensed guaiacyl (130.5-129 ppm); HP, hydroxyphenyl OH (129-128 ppm); COOH, carboxylic acid (128-126 ppm).

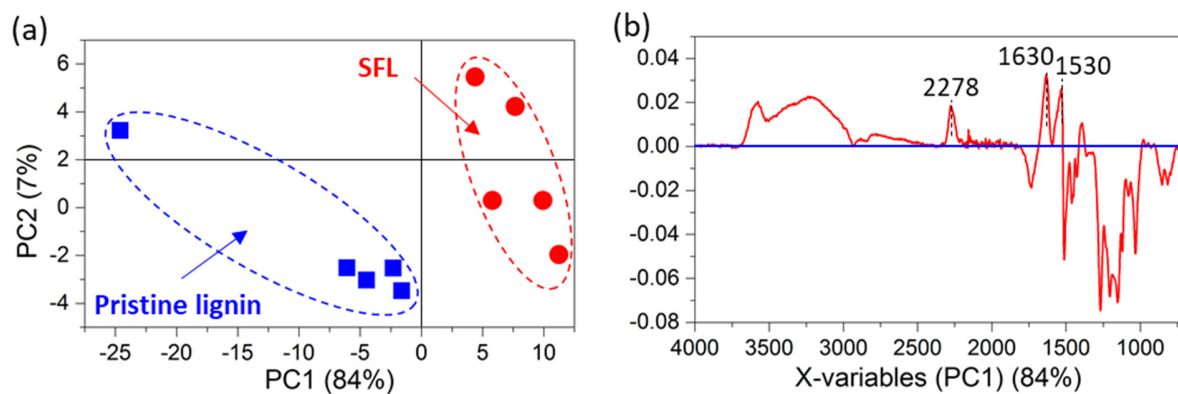

**Figure S2.** (a) score plot of PCA model (PC1 vs. PC2) and (b) loading plot of PC1 of PCA model.

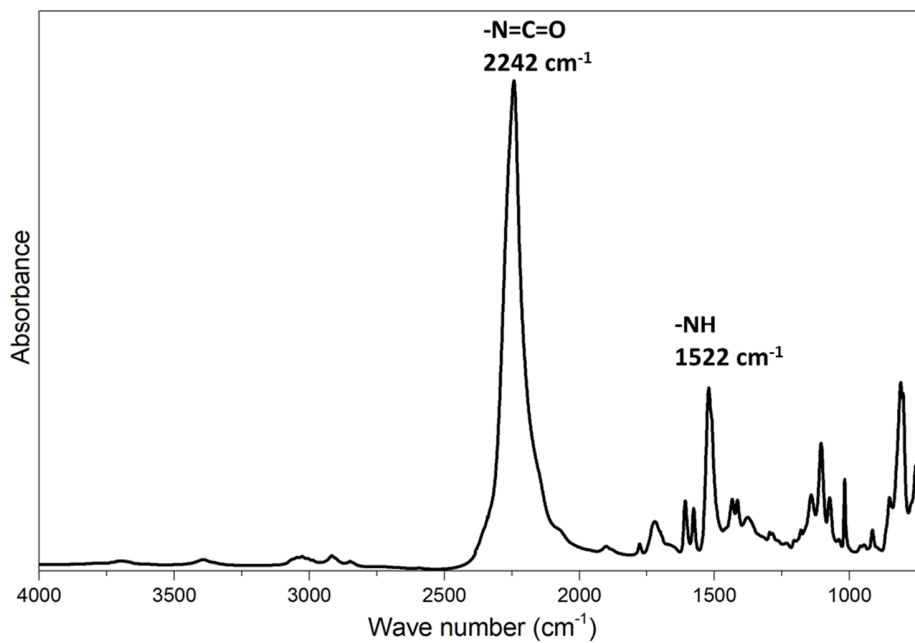

**Figure S3.** FTIR spectrum of pMDI (A-23-015).

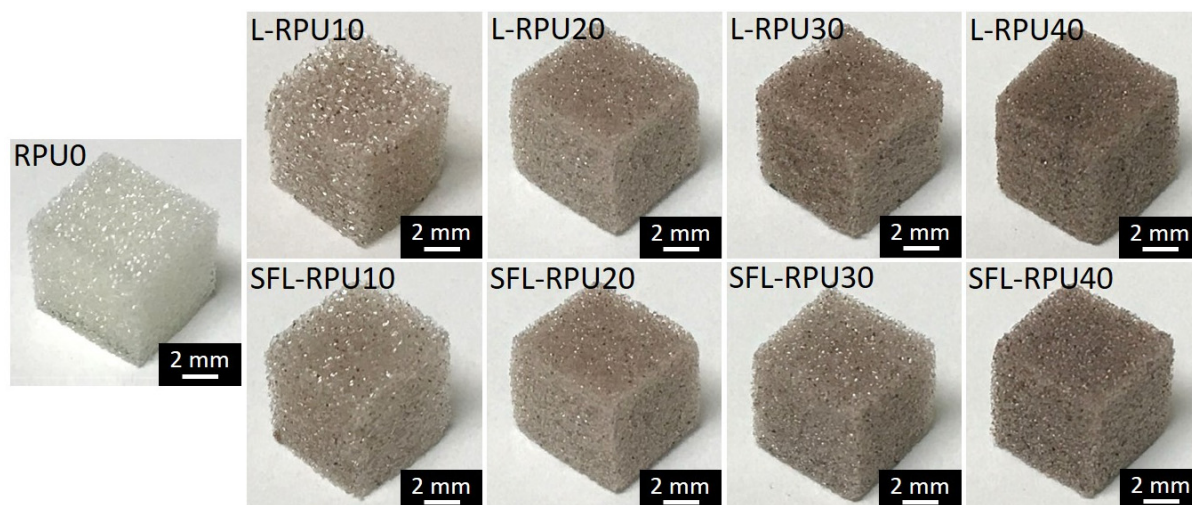

**Figure S4.** Photographs of RPU foams made with different amounts (0-40%) of lignin: L-RPU (top row) and SFL-RPU (bottom row).

**Table S6.** Compressive properties of RPU foams containing 0-40% lignin.

| Samples          | Compressive strength<br>( $\sigma$ , kPa) | Compressive modulus<br>( $E$ , kPa) | Specific compressive strength<br>[ $\sigma_p$ , kPa/(kg/m <sup>3</sup> )] | Specific compressive modulus<br>[ $E_p$ , kPa/(kg/m <sup>3</sup> )] |
|------------------|-------------------------------------------|-------------------------------------|---------------------------------------------------------------------------|---------------------------------------------------------------------|
| <b>RPU0</b>      | 166.3±7.7                                 | 189.5±26.0                          | 4.8±0.4                                                                   | 5.5±0.8                                                             |
| <b>L-RPU10</b>   | 146.2±16.5                                | 174.3±21.1                          | 4.3±0.5                                                                   | 5.1±0.7                                                             |
| <b>L-RPU20</b>   | 174.4±32.8                                | 193.0±31.7                          | 4.8±0.7                                                                   | 5.3±0.7                                                             |
| <b>L-RPU30</b>   | 160.9±19.2                                | 188.1±29.5                          | 3.9±0.3                                                                   | 4.5±0.6                                                             |
| <b>L-RPU40</b>   | 135.9±33.5                                | 153.9±35.6                          | 2.5±0.5                                                                   | 2.9±0.6                                                             |
| <b>SFL-RPU10</b> | 174.6±14.3                                | 193.2±18.2                          | 4.9±0.4                                                                   | 5.4±0.5                                                             |
| <b>SFL-RPU20</b> | 196.1±19.7                                | 225.5±14.8                          | 5.1±0.4                                                                   | 5.9±0.4                                                             |
| <b>SFL-RPU30</b> | 205.1±26.5                                | 228.9±27.9                          | 4.9±0.6                                                                   | 5.5±0.6                                                             |
| <b>SFL-RPU40</b> | 157.8±51.8                                | 176.1±57.8                          | 3.7±1.1                                                                   | 4.2±1.3                                                             |

**Table S7.** The intensity ratio of N=C=O band to C=O band ( $I_{\text{NCO}}/I_{\text{CO}}$ ) of RPU foams containing 0-40% lignin.

| <b>Samples</b>   | <b><math>I_{\text{NCO}}/I_{\text{CO}}</math></b> |
|------------------|--------------------------------------------------|
| <b>RPU0</b>      | 0.17±0.04                                        |
| <b>L-RPU10</b>   | 0.27±0.04                                        |
| <b>L-RPU20</b>   | 0.30±0.05                                        |
| <b>L-RPU30</b>   | 0.36±0.04                                        |
| <b>L-RPU40</b>   | 0.41±0.05                                        |
| <b>SFL-RPU10</b> | 0.21±0.02                                        |
| <b>SFL-RPU20</b> | 0.25±0.03                                        |
| <b>SFL-RPU30</b> | 0.29±0.03                                        |
| <b>SFL-RPU40</b> | 0.32±0.06                                        |

**Table S8.** TGA results ( $T_{5\%}$ , DTG-max temperatures, and char yield at 750°C) of RPU foams.

| <b>Sample</b>    | <b><math>T_{5\%}</math> (°C)</b> | <b>DTG-max (°C)</b> | <b>Char yield at 750°C (wt%)</b> |
|------------------|----------------------------------|---------------------|----------------------------------|
| <b>RPU0</b>      | 240.3                            | 0.757               | 20.3                             |
| <b>L-RPU10</b>   | 245.9                            | 0.698               | 22.7                             |
| <b>L-RPU20</b>   | 252.6                            | 0.609               | 25.2                             |
| <b>L-RPU30</b>   | 251.8                            | 0.578               | 26.2                             |
| <b>L-RPU40</b>   | 258.9                            | 0.514               | 28.4                             |
| <b>SFL-RPU10</b> | 245.2                            | 0.720               | 22.1                             |
| <b>SFL-RPU20</b> | 246.4                            | 0.661               | 23.1                             |
| <b>SFL-RPU30</b> | 247.6                            | 0.585               | 25.2                             |
| <b>SFL-RPU40</b> | 253.9                            | 0.517               | 29.1                             |



### *LCA units and model output*

**Table S9.** LCIA Categories and Units

| <b>Impact category</b>                         | <b>Unit</b>                 |
|------------------------------------------------|-----------------------------|
| environmental impact - acidification           | moles of H <sup>+</sup> -Eq |
| environmental impact - ecotoxicity             | kg 2,4-D-Eq                 |
| environmental impact - eutrophication          | kg N                        |
| environmental impact - global warming          | kg CO <sup>2</sup> -Eq      |
| environmental impact - ozone depletion         | kg CFC-11-Eq                |
| environmental impact - photochemical oxidation | kg NO <sub>x</sub> -Eq      |
| human health - carcinogenics                   | kg benzene-Eq               |
| human health - non-carcinogenics               | kg toluene-Eq               |
| human health - respiratory effects, average    | kg PM2.5-Eq                 |

**Table S10.** Desired model output stipulations.

| <b>Name</b>               | <b>Product system</b>                         | <b>Flow</b>                              | <b>Amount</b> | <b>Unit</b> |
|---------------------------|-----------------------------------------------|------------------------------------------|---------------|-------------|
| Liquefaction              | Liquefaction Method, at plant                 | polyurethane, rigid foam, at plant - RER | 1             | kg          |
| Oxypropylation            | Oxypropylation Method, at plant               | polyurethane, rigid foam, at plant - RER | 1             | kg          |
| Surface Functionalization | Surface Functionalization Method, at plant    | polyurethane, rigid foam, at plant - RER | 1             | kg          |
| Traditional               | polyurethane, rigid foam, at plant (modified) | polyurethane, rigid foam, at plant - RER | 1             | kg          |

### **REFERENCE**

[S1] Bernier, Etienne, Chantal Lavigne, and Pierre Yves Robidou. "Life cycle assessment of kraft lignin for polymer applications." *The International Journal of Life Cycle Assessment* 18, no. 2 (2013): 520-528.
